# Supplementary material for: Phosphorus and Nitrogen Regulate Arbuscular Mycorrhizal Symbiosis in Petunia hybrida
Source: PLoS One. 2014 Mar 7;9(3):e90841. doi: 10.1371/journal.pone.0090841 (PMC3946601; doi:10.1371/journal.pone.0090841)
Supplement: Table S1 — Nutrient content of plant growth substrate. (XLSX) [file pone.0090841.s003.xlsx]

## Sheet: Sheet1
Supplemental Table S1. Nutrient content of the substrate
Nutrient element*	Substrate content (mg/g dry soil)
	Average	Standard deviation
Potassium	28.86	0.43
Magnesium	139.82	2.58
Calcium	1291.22	376.21
Phosphorus	44.76	4.43
Nitrogen	40.38	4.62
Sodium	3.87	0.82
n=3
*The content of copper, manganese, iron, zinc, and nickel was below detection limit
