# Supplementary material for: Phosphorus and Nitrogen Regulate Arbuscular Mycorrhizal Symbiosis in Petunia hybrida
Source: PLoS One. 2014 Mar 7;9(3):e90841. doi: 10.1371/journal.pone.0090841 (PMC3946601; doi:10.1371/journal.pone.0090841)
Supplement: Table S2 — Composition of nutrient solutions. (XLSX) [file pone.0090841.s004.xlsx]

## Sheet: Sheet1
Supplemental Table S2. Composition of nutrient solutions
	basic Nut. Sol.	+P	+P -N	+P -S	+P -K	+P -Mg	+P -Ca	+P -Fe
Macroelements (mM)
MgSO4.7H20	3	3	3		3		3	3
MgCl2				3
KNO3	0.75	0.75		0.75		0.75	3.79	0.75
K2SO4			0.75			3
KCl	0.87	0.87	1.62	1.62		0.87	0.87	0.87
NaCl					0.87
KH2PO4	0.03	5	5	5		5	5	5
NaH2PO4					5
Ca(NO3)2.4H20	1.52	1.52		1.52	1.9	1.52		1.52
CaCl2			1.52
Microelements (mM)
NaFeEDTA	20	20	20	20	20	20	20
NaCl								20
MnSO4.4H2O	11	11	11	11	11	11	11	11
ZnSO4.7H2O	1	1	1	1	1	1	1	1
H3BO3	30	30	30	30	30	30	30	30
CuSO4.5H20	0.96	0.96	0.96	0.96	0.96	0.96	0.96	0.96
(NH4)6Mo7O24.4H20	0.03	0.03	0.03	0.03	0.03	0.03	0.03	0.03
Na2MoO4.2H20	0.01	0.01	0.01	0.01	0.01	0.01	0.01	0.01
