# Supplementary material for: Phosphorus and Nitrogen Regulate Arbuscular Mycorrhizal Symbiosis in Petunia hybrida
Source: PLoS One. 2014 Mar 7;9(3):e90841. doi: 10.1371/journal.pone.0090841 (PMC3946601; doi:10.1371/journal.pone.0090841)
Supplement: Table S6 — Primers for quantitative real time RT-PCR (qPCR). (XLSX) [file pone.0090841.s008.xlsx]

## Sheet: Sheet1
Supplemental Table S6. Primers for quantitative real time RT-PCR (qPCR) analysis
Array ID	Function	Gene ID	Forward primer	Reverse Primer
cn8666	High affinity nitrate transporter	NRT2	CGTCAAGGGAACTGAGGAACATTAT	AAAGCTCTCATTGAACCATCAACCA
CL1918	Putative nitrite transporter	Nitr1	AAGATGATGAAATTTGCAAGGAAGC	ACCACTGTAACAGCTACAAGCATGG
cn5272	Nitrate transporter	NRT1	GTGGACCAATTTGATTCAACAACAA	AGAAAATACTTCCTTCGGGCTTCAC
cn8237	Phosphate transporter 4	PT4	TTGATGAATTTTGAAGGTAAACCATTTAACGTG	AGTGTTGGCTTTGCTAGTAAGTCCCATAAC
